# Supplementary material for: One small molecule as a theranostic agent: naphthalimide dye for subcellular fluorescence localization and photodynamic therapy in vivo
Source: Royal Society of Chemistry journal article supplement (doi:10.1039/c6md00104a), 2016-01-01
Supplement: c6md00104a1.pdf [file c6md00104a1.pdf]

## Supporting Information

# One Small Molecule as Theranostic Agent: Naphthalimide Dye for Subcellular Fluorescent Localization and Photodynamic Therapy *in vivo*

Lei Zhang,<sup>a,†</sup> KechengLei,<sup>b,‡</sup> JingwenZhang,<sup>a</sup> WenlinSong,<sup>a</sup> YuanhongZheng,<sup>b</sup> Shaoying Tan,<sup>a</sup> Yuwei Gao,<sup>b</sup> YufangXu,<sup>a,\*</sup> JianwenLiu,<sup>b,\*</sup> XuhongQian<sup>a,\*</sup>

<sup>a</sup> State Key Laboratory of Bioreactor Engineering, Shanghai Key Laboratory of Chemical Biology, School of Pharmacy, East China University of Science and Technology, Shanghai 200237, China. Fax: +86 21 6425 2603; Tel: +86 21 6425 3589; E-mail: [xhqian@ecsut.edu.cn](mailto:xhqian@ecsut.edu.cn); [yfxu@ecust.edu.cn](mailto:yfxu@ecust.edu.cn).

<sup>b</sup> State Key Laboratory of Bioreactor Engineering, Shanghai Key Laboratory of New Drug Design, School of Pharmacy, East China University of Science and Technology, Shanghai 200237, China

## Table of Contents:

### 1. Materials and Instruments

### 2. Synthesis

### 3. Method

#### 3.1 Spectroscopic materials and methods

#### 3.2 Determination of fluorescent quantum yield

#### 3.3 Determination of singlet oxygen quantum yield

#### 3.4 Cell culture

#### 3.5 Cell viability assay

#### 3.6 *In vitro* imaging of 1a

#### 3.7 *In vivo* experiments

#### 3.8 H&E staining

#### 3.9 Mechanistic study

#### 3.10 Statistical analysis

## 4. Data

## 5. NMR spectra

## 6. References

### 1. Materials and Instruments

All chemical reagents and solvents are analytic grade and chemicals were purchased from TCI and J&K reagent Co. Ltd without further purification. Compounds were purified through column chromatography with silica gel (HaiYang, Qingdao) 300-400 mesh.

$^1\text{H}$  NMR and  $^{13}\text{C}$  NMR spectra were collected by Bruker AM-400 or AM-500 spectrometer (in  $\text{CDCl}_3$ ,  $\text{CD}_3\text{OD}$  and  $\text{DMSO}-d_6$ , TMS as the internal standard), HRMS was conducted in the Analysis and Test Center of East China University of Science and Technology (ECUST). The purifications of final compounds were tested by HPLC performed on a Hewlett-Packard 1100 system chromatograph with a photodiode array detector using a Zorbax RX-C18, 250 mm  $\times$  4.6 mm column. The mobile phase was a gradient of 30-100% acetonitrile (solvent 1) and 10 mM  $\text{NH}_4\text{OAc}$  in water (pH 6.0) (solvent 2) at a flow rate of 1.0 mL/min (0-15.0 min, 30-100% solvent 1). The melting points of compounds were obtained by WRS-1B-digital melting point apparatus. Spectroscopic properties were measured on All Varian Cary 100 UV spectrophotometer and Varian Cary Eclipse FL spectrophotometer and the singlet oxygen quantum yields were accomplished by monochromatic light system composed of CM 110 1/8mm monochromator and ASB-XE-175 Xenon light source from Spectral Products. Optical imaging was performed through fluorescence microscope and confocal microscopy (Nikon, Japan).

### 2. Synthesis

#### 4-bromo-3-nitro-1,8-naphthalic anhydride (**2**).

4-bromo-1,8-naphthalic anhydride (5.54 g, 20 mmol) was stirred in 20 mL concentrated sulphuric acid at 0 °C, sodium nitrate (2.10 g, 24 mmol) was then added slowly within 30 min and the mixture was stirred at room temperature for 3 hours. The mixture was then poured into 200 mL ice water accompanied with stirring fierce and filtrated to get residue. The residue was purified through recrystallization with acetic acid to give out **2**, light yellow solid, yields: 72%. mp > 300 °C.  $^1\text{H}$  NMR (400 MHz,  $\text{DMSO}-d_6$ ):  $\delta$  8.91 (s, 1H), 8.82 (d,  $J$  = 8.4 Hz, 1H), 8.73 (d,  $J$  = 7.2 Hz, 1H), 8.18 (t,  $J$  = 7.6 Hz, 1H).  $^{13}\text{C}$  NMR (100 MHz,  $\text{DMSO}-d_6$ ): 160.10, 159.50, 149.83, 135.69, 135.37, 131.40, 130.96, 130.93, 126.03, 122.25, 121.54, 120.90. MS (EI) calcd for  $\text{C}_{12}\text{H}_4\text{BrNO}_5$   $[\text{M}]^+$ : 320.9, found: 320.9.

#### 4-((4-bromophenyl)thio)-3-nitro-1,8-naphthalic anhydride (3a).

Compound **2** (2.00 g, 6.21 mmol) was dissolved in 25 mL ethanol, 4-bromobenzenethiol (1.47 g, 7.76 mmol) was then added and the reaction was heated at 80 °C for 5 hours. The mixture was evaporated in vacuum and purified on silica gel chromatography (PE/DCM = 3/1, v/v) to perform **3a**, yellow solid, yield: 82%. mp 194.5-195.4 °C. <sup>1</sup>H NMR (400 MHz, DMSO-*d*<sub>6</sub>): δ 8.97 (s, 1H), 8.82 (dd, *J*<sub>1</sub> = 0.8 Hz, *J*<sub>2</sub> = 8.4 Hz, 1H), 8.67 (dd, *J*<sub>1</sub> = 1.2 Hz, *J*<sub>2</sub> = 7.2 Hz, 1H), 8.06 (t, *J* = 7.6 Hz, 1H), 7.51 (dd, *J*<sub>1</sub> = 2.0 Hz, *J*<sub>2</sub> = 8.8 Hz, 2H), 7.16 (dd, *J*<sub>1</sub> = 2.0 Hz, *J*<sub>2</sub> = 8.8 Hz, 2H). <sup>13</sup>C NMR (100 MHz, DMSO-*d*<sub>6</sub>): 160.10, 159.74, 153.44, 134.90, 134.49, 134.10, 133.07, 132.36, 131.39, 131.29, 131.04, 130.97, 125.41, 123.29, 121.47, 121.26. HRMS (ESI) calcd for C<sub>18</sub>H<sub>9</sub>BrNO<sub>5</sub>S [M+H]<sup>+</sup>: 429.9379, found: 429.9384

#### 4-phenylthio-3-nitro-1,8-naphthalic anhydride (3b).<sup>S1</sup>

Compound **2** (2.00 g, 6.21 mmol) was dissolved in 25 mL ethanol, benzenethiol (0.86 g, 7.76 mmol) was then added and the reaction was heated at 80 °C for 5 hours. The mixture was evaporated in vacuum and purified on silica gel chromatography (PE/DCM = 3/1, v/v) to give out **3b**, yellow solid, yield: 75%. mp 177.6-178.9 °C. <sup>1</sup>H NMR (400 MHz, CDCl<sub>3</sub>+CD<sub>3</sub>OD): δ 8.92 (d, *J* = 8.4 Hz, 1H), 8.82 (s, 1H), 8.73 (d, *J* = 7.2 Hz, 1H), 7.90 (t, *J* = 8.0 Hz, 1H), 7.26-7.19 (m, 3H), 7.11 (d, *J* = 7.6 Hz, 2H). <sup>13</sup>C NMR (100 MHz, CDCl<sub>3</sub>+CD<sub>3</sub>OD): 159.15, 158.88, 152.24, 136.43, 136.19, 135.63, 135.40, 130.62, 130.19, 129.80, 129.70, 129.36, 128.76, 128.34, 127.09, 126.52.

#### 4-((4-bromophenyl)thio)-3-amino-1,8-naphthalic anhydride (4a).

Stannous chloride dihydrate (2.26 g, 10 mmol) was stirred in 15 mL concentrated hydrochloric acid at room temperature for 10 mins, **3a** was added slowly and the reaction was then heated at 85 °C for 3 hours, the mixture was filtered and washed with water until the filtrate was neutral, and residue was dried and purified on silica gel chromatography (PE/DCM = 1/1, v/v) to give out **4a**, yellow green solid, yield: 85%. mp > 300 °C. <sup>1</sup>H NMR (400 MHz, CDCl<sub>3</sub>): δ 8.63 (d, *J* = 8.4 Hz, 1H), 8.37 (d, *J* = 7.6 Hz, 1H), 8.15 (s, 1H), 7.73 (t, *J* = 7.6 Hz, 1H), 7.32 (d, *J* = 8.8 Hz, 2H), 6.90 (d, *J* = 8.8 Hz, 2H), 5.06 (s, 2H). <sup>13</sup>C NMR (100 MHz, CDCl<sub>3</sub>): 168.68, 160.55, 149.37, 139.26, 135.63, 133.74, 132.35, 131.72, 129.10, 128.87, 128.04, 123.55, 120.85, 119.87, 118.85, 112.26. HRMS (ESI) calcd for C<sub>18</sub>H<sub>11</sub>BrNO<sub>3</sub>S [M+H]<sup>+</sup>: 399.9638, found: 399.9639.

#### 4-phenylthio-3-amino-1,8-naphthalic anhydride (4b).<sup>S1</sup>

Stannous chloride dehydrate (2.26 g, 10 mmol) was stirred in 15 mL concentrated hydrochloric acid at room temperature for 10 mins, **3b** was added slowly and the reaction was then heated at 85 °C for 3 hours, the mixture was filtered and washed with water until the filtrate was neutral, and

residue was dried and purified on silica gel chromatography (PE/DCM = 1/1, v/v) to give out **4b**, yellow green solid, yield: 80%. mp 225.9-226.7 °C. <sup>1</sup>H NMR (400 MHz, CDCl<sub>3</sub>+CD<sub>3</sub>OD): δ 8.68 (d, *J* = 8.4 Hz, 1H), 8.36 (d, *J* = 7.2 Hz, 1H), 8.16 (s, 1H), 7.72 (t, *J* = 8.0 Hz, 1H), 7.22-7.15 (m, 3H), 7.03 (d, *J* = 7.6 Hz, 2H), 5.09 (s, 2H). <sup>13</sup>C NMR (100 MHz, CDCl<sub>3</sub>+CD<sub>3</sub>OD): 160.80, 160.74, 149.42, 135.73, 134.47, 132.01, 129.30, 128.94, 128.62, 126.55, 126.12, 124.37, 123.56, 120.40, 118.64, 113.15. MS (ESI) calcd for C<sub>18</sub>H<sub>11</sub>NO<sub>3</sub>S [M+H]<sup>+</sup>: 322.0, found: 322.0.

**9-bromo-*N*-(2-(2-hydroxyethoxy)ethyl)-benzo[k,l]thioxanthene-3,4-naphthalimide (1a) and 9-bromo-*N*-(2-(2-hydroxyethoxy)ethyl)-benzo[b]furano[2,1-c]naphthalimide (1b).**

Sodium nitrite (0.38 g, 5.5 mmol) was added to 32 mL concentrated sulphuric acid and 12 mL acetic acid in three times at -5 °C, **4a** (2.00 g, 5 mmol) was then added slowly within 45 mins, the mixture was stirred for another 1 hour to give out black viscous liquid. At the same time, anhydrous cupric sulfate (34.00 g, 213 mmol) was dissolved in 350 mL deionized water and 45 mL acetic acid, and the blue solution was heated under reflux. Then the black liquid was added dropwise to the blue solution, the mixture was sequentially warmed at 100 °C for another 6 hours, and filtered to give out the brown solid. The solid was then stirred in 10 mL anhydrous ethanol with diglycolamine (0.22 g, 0.20 mL) at 50 °C for 3 hours. The mixture was evaporated in vacuum and residue was purified on silica gel chromatography (PE/DCM = 1/1, v/v and then DCM/MeOH = 100/1) to give out **1b**, light yellow solid, yield: 70% and **1a**, orange solid, yield: 18%. mp (**1a**) 217.7-218.4 °C. <sup>1</sup>H NMR (500 MHz, CDCl<sub>3</sub>): δ 8.47 (d, *J* = 8.0 Hz, 1H), 8.30 (d, *J* = 8.0 Hz, 1H), 8.23 (s, 1H), 8.05 (d, *J* = 8.0 Hz, 1H), 7.46 (d, *J* = 9.0 Hz, 1H), 7.43 (d, *J* = 8.0 Hz, 1H), 7.20 (d, *J* = 9.0 Hz, 1H), 4.37 (t, *J* = 5.5 Hz, 2H), 3.79 (t, *J* = 5.5 Hz, 2H), 3.62 (t, *J* = 4.5 Hz, 2H), 3.58 (t, *J* = 4.5 Hz, 2H). <sup>13</sup>C NMR (100 MHz, CDCl<sub>3</sub>): 164.15, 163.69, 140.11, 135.53, 132.91, 132.71, 131.08, 130.51, 130.30, 129.65, 128.92, 127.70, 125.35, 121.46, 121.39, 120.69, 119.56, 117.90, 72.50, 68.43, 61.52, 39.80. HPLC purity: 95.3%, Retention time = 13.73 min. HRMS (EI) calcd for C<sub>22</sub>H<sub>16</sub>BrNO<sub>4</sub>S [M]<sup>+</sup>: 468.9983, found: 468.9982. mp (**1b**) 201.3-201.7 °C. <sup>1</sup>H NMR (400 MHz, CDCl<sub>3</sub>): δ 8.67 (s, 1H), 8.47 (d, *J* = 7.2 Hz, 1H), 8.14 (d, *J* = 8.0 Hz, 1H), 8.02 (d, *J* = 1.6 Hz, 1H), 7.70 (t, *J* = 8.0 Hz, 1H), 7.64 (d, *J* = 8.4 Hz, 1H), 7.51 (dd, *J*<sub>1</sub> = 1.6 Hz, *J*<sub>2</sub> = 8.4 Hz, 1H), 4.41 (t, *J* = 5.6 Hz, 2H), 3.91 (t, *J* = 5.6 Hz, 2H), 3.75~3.73 (m, 4H), 2.36 (brs, 1H). <sup>13</sup>C NMR (100 MHz, CDCl<sub>3</sub>): 164.12, 163.91, 143.92, 137.13, 137.10, 131.80, 131.02, 130.43, 129.75, 127.50, 126.62, 126.58, 124.81, 124.63, 124.04, 123.25, 119.70, 119.62, 72.38, 68.49, 61.90, 39.72. HPLC purity: 99.5%, Retention time = 14.34 min. HRMS (EI) calcd for C<sub>22</sub>H<sub>16</sub>BrNO<sub>4</sub>S [M]<sup>+</sup>: 468.9983, found: 468.9981.

***N*-(2-(2-hydroxyethoxy)ethyl)-benzo[k,l]thioxanthene-3,4-naphthalimide (1c) and *N*-(2-(2-hydroxyethoxy)ethyl)-benzo[b]furano[2,1-c]naphthalimide (1d).<sup>S1</sup>**

Sodium nitrite (0.38 g, 5.5 mmol) was added to 32 mL concentrated sulphuric acid and 12 mL acetic acid in three times at -5 °C, **4b** (1.60 g, 5 mmol) was then added slowly within 45 mins, the mixture was stirred for another 1 hour to give out black viscous liquid. At the same time, anhydrous cupric sulfate (34.00 g, 213 mmol) was dissolved in 350 mL deionized water and 45 mL acetic acid, and the blue solution was heated under reflux. Then the black liquid was added dropwise to the blue solution, the mixture was sequentially warmed at 100 °C for another 6 hours, and filtered to give out the brown solid. The solid was then stirred in 10 mL anhydrous ethanol with diglycolamine (0.22 g, 0.20 mL) at 50 °C for 3 hours. The mixture was evaporated in vacuum and residue was purified on silica gel chromatography (PE/DCM = 1/1, v/v and then DCM/MeOH = 100/1) to give out **1d**, light yellow solid, yield: 55% and **1c**, orange solid, yield: 20%. mp (**1c**) 192.5-193.8 °C. <sup>1</sup>H NMR (500 MHz, CDCl<sub>3</sub>): δ 8.41 (d, *J* = 8.0 Hz, 1H), 8.24 (d, *J* = 8.0 Hz, 1H), 8.02 (d, *J* = 7.5 Hz, 1H), 7.94 (d, *J* = 8.0 Hz, 1H), 7.25~7.34 (m, 4H), 4.39 (t, *J* = 5.0 Hz, 2H), 3.87 (t, *J* = 5.0 Hz, 2H), 3.72-3.73 (m, 2H), 3.70-3.71 (m, 2H). <sup>13</sup>C NMR (125 MHz, CDCl<sub>3</sub>): 164.12, 163.69, 140.74, 136.77, 132.68, 131.62, 130.88, 130.32, 130.00, 127.84, 127.61, 126.40, 126.10, 125.34, 120.92, 120.35, 119.14, 117.76, 72.30, 68.49, 61.90, 39.58. HPLC purity: 98.3%, Retention time = 11.61 min. HRMS (EI) calcd for C<sub>22</sub>H<sub>17</sub>NO<sub>4</sub>S [M]<sup>+</sup>: 391.0878, found: 391.0875. mp (**1d**) 160.0-160.7 °C. <sup>1</sup>H NMR (400 MHz, CDCl<sub>3</sub>): δ 8.89 (s, 1H), 8.45 (d, *J* = 7.2 Hz, 1H), 8.19 (d, *J* = 8.0 Hz, 1H), 8.09 (dd, *J*<sub>1</sub> = 2.0 Hz, *J*<sub>2</sub> = 5.2 Hz, 1H), 7.84 (dd, *J*<sub>1</sub> = 2.8 Hz, *J*<sub>2</sub> = 5.2 Hz, 1H), 7.67 (t, *J* = 8.0 Hz, 1H), 7.48~7.50 (m, 2H), 4.41 (t, *J* = 5.2 Hz, 2H), 3.91 (t, *J* = 5.2 Hz, 2H), 3.72-3.74 (m, 4H), 2.76 (brs, 1H). <sup>13</sup>C NMR (100 MHz, DMSO-*d*<sub>6</sub>): 162.78, 162.71, 142.03, 137.75, 134.69, 131.99, 129.75, 129.36, 127.37, 127.34, 125.64, 125.34, 125.23, 123.77, 122.82, 122.24, 122.01, 118.64, 72.08, 66.88, 60.21, 38.71. HPLC purity: 99.5%, Retention time = 12.17 min. HRMS (EI) calcd for C<sub>22</sub>H<sub>17</sub>NO<sub>4</sub>S[M]<sup>+</sup>: 391.0878, found: 391.0881.

### 3. Methods

#### 3.1 Spectroscopic materials and methods

Spectroscopic properties were measured on All Varian Cary 100 UV spectrophotometer and Varian Cary Eclipse FL spectrophotometer and the singlet oxygen quantum yields were accomplished by monochromatic light system composed of CM 110 1/8 m monochromator and ASB-XE-175 Xenon light source from Spectral Products. Optical imaging was performed through fluorescence microscope and confocal microscopy (Nikon, Japan).

#### 3.2 Determination of fluorescent quantum yield

All compounds were dissolved in ethanol at room temperature. Absorbance spectra and relevant fluorescence spectra were collected by a Varian Cary 100 UV-Vis spectrophotometer and a Varian Cary Eclipse Fluorescence spectrophotometer. The molar extinction coefficients were obtained by

Lambert-Beer's Law and fluorescence quantum yields were calculated as below:

$$\Phi_F = \Phi_R \left( \frac{S}{S_R} \right) \left( \frac{\eta}{\eta_R} \right) \quad (1)$$

where  $\Phi$  is the fluorescence quantum yield,  $S$  is the slope of integrated fluorescence intensity vs. absorbance,  $\eta$  is the relatively refractive index of solvent, subscript  $R$  indicate the reference standard of 4-*N*-butylamide-*N*-butyl-1,8-naphthalimide, whose fluorescent quantum yield ( $\Phi_R$ ) was 0.81 in ethanol.

### 3.3 Determination of singlet oxygen quantum yield<sup>S2</sup>

To quantify the irradiation-induced singlet oxygen ( $^1O_2$ ), a singlet oxygen trap 1,3-Diphenylisobenzofuran (DPBF) was used in air-saturated acetonitrile. Compounds were dissolved in acetonitrile and added to 100-fold excess DPBF stock solution. After laser irradiation with a monochromator (ASB-XE-175 Xenon light source), the absorbance of DPBF at 410 nm was recorded every half or one minute. Methylene Blue (whose singlet oxygen quantum yield was 0.52 in acetonitrile) was utilized as a contrast. The singlet oxygen quantum yields were determined using the equation:

$$\Phi_{\Delta(T)} = \Phi_{\Delta(MB)} \left( \frac{S_T}{S_{MB}} \right) \left( \frac{F_T}{F_{MB}} \right) \quad (2)$$

Where  $\Phi_{\Delta}$  is the singlet oxygen quantum yield,  $S$  is the slope of absorbance of DPBF vs. irradiation time and  $F$  is the absorption correction factor.

### 3.4 Cell culture

Human cell lines (MCF-7, HCT116, U87, MKN45, A375) were purchased from The Cell Bank of Type Culture Collection of the Chinese Academy of Sciences (Shanghai, China). Cells were cultured in RPMI-1640 or DMEM medium, supplemented with 10% fetal bovine serum (FBS, Hyclone, USA) and 1% antibiotic- antimycotic (ABAM Life Technologies, California, USA) in a humidified atmosphere of 95% air and 5% CO<sub>2</sub>.

### 3.5 Cell viability assay

To evaluate the tumor inhibitory efficacy of **1a-1d**, MCF-7 cells ( $1 \times 10^4$ ) were suspended in medium and plated in 96 well plates. After treatment with indicated concentrations (0-20  $\mu$ M) of **1a-1d** for 48 hours, cells were irradiated with the 100-watt quartz-halogen lamp. The fluorescence rate was 240 W/m<sup>2</sup>, measured by a photo radiometer (Delta Ohm, Padua, Italy). After 20 mins of PDT treatment and 4 hours of MTT incubation, the cell viability was determined by MTT assay.<sup>S3</sup> As the optimal candidate, **1a** was then solely evaluated in other cell lines including HCT116, U87,

MKN45 and A375 cells by the same methods above.

### **3.6 *In vitro* imaging of 1a**

#### **3.6.1 Fluorescence microscopic imaging**

With a aim to assess fluorescent imaging results *in vitro*, A375 cells ( $1 \times 10^5$ ) were treated with **1a** (2.5  $\mu$ M, 2 mL) for 48 h. After that, cells were exposed to the light of 28.8 J/cm<sup>2</sup> within 20 mins for PDT. 4 hours later, the cells were rinsed with PBS for three times. Images were exposed by excitation at 460 nm and emission at 520 nm under an inverted Fluorescence microscope (Nikon, Japan).

#### **3.6.2 Subcellular localization studies**

A375 cells ( $1 \times 10^5$ ) were seeded on a coverslip and co-incubated with **1a** (2.5  $\mu$ M, 2 mL) for 48 hours. After 20 mins of PDT treatment, the cells were rinsed with PBS for three times and incubated in culture medium with 100 nM MitoTracker Red (Invitrogen, USA) for 20 mins, 100 nM ER-Tracker Red for 20 mins (Beyotime, China), 50 nM Lysosome Tracker Red (Beyotime, China) for 30 mins, 1  $\mu$ M DAPI (Beyotime, China) for 15 mins, respectively. The stained live cells were observed by confocal microscopy (Nikon, Japan).

### **3.7 *In vivo* experiments**

All six-weeks old nude mice with half males and half females were purchased from Shanghai Slac Laboratory Animal Co. Ltd (The license of experimental animal: SCXK(shanghai) 2012-0002). The mice were maintained under the 12 hour light/dark cycles condition in the specific pathogen free (SPF) cleanroom with fresh air (more than 50%), appropriate temperature (22-26 °C) and humidity (40%-60%). The mice were freely fed with enough sterilized water and food bought from Shanghai Slac Laboratory Animal Co. Ltd. All materials and containers were disinfected and sterilized before use. After the treatment, the mice were anesthetized and euthanized in accordance with the international ethical standards. All experimental procedures involving animals in this study were reviewed and approved by the institution of ethics committee in ECUST and strictly conducted according to the guidelines of Care and Use of Laboratory Animals of China (GB14925-2001) for animal experimentation.

Each nude mouse was anesthetized with pentobarbitalum natricum and subcutaneously inoculated with injection of  $1 \times 10^6$  A375 cells. When the volume of the tumor grew to 100 mm<sup>3</sup> size, mice were randomized into three groups: control group, medicine group and PDT group (each group had 6 mice). **1a** (5 mg/kg) was injected into both medicine group and PDT group of mice *in situ* while saline in the control group. After 8 hours, 600-micron bare fiber was used to give PDT treatment by white light from ASB-XE-175 Xenon light source and it was totally irradiated with a light-dose of 259.2 J/cm<sup>2</sup> within 60 min. All groups were administered the injection twice a week,

total 6 times during the treatment time. Tumor sizes were measured every 3 days using micrometer calipers. 4 hours after the laser treatment, tumor xenografts were removed and measured. During the experiment, tumor sizes were measured every 3 days using micrometer calipers and tumor volume (TV) was calculated using the following formula:  $TV\ (mm^3) = D \times d^2/2$ , D is the shortest diameters while d is the longest one. Relative tumor volume (RTV) was calculated according to the equation:  $RTV = V_t/V_0$ , where  $V_0$  is the tumor volume at day 0 and  $V_t$  is the tumor volume at day t.

### **3.8 H&E staining**

Hematoxylin-eosin staining was a conventional method for observing the histological changes of the tissues. After indicated experiments, all of the tumor tissues and several visceral organs tissues were collected and embedded in paraffin. The slices were separately treated with hematoxylin and eosin solution and images were taken with fluorescence microscope (Nikon, Japan).

### **3.9 Mechanistic study**

#### **3.9.1 Measurement of oxidative damage**

DCFH-DA method(2',7'-dichlorofluorescein diacetate) was employed to evaluate intracellular reactive oxygen species (ROS) level.<sup>S4</sup>After 20 mins PDT treatment, cells were collected in serum-free medium and co-incubated with 10  $\mu$ M DCFH-DA at 37 °C for another 20 mins. Cells were then washed three times with PBS and ROS generation was measured using fluorescence intensity of excitation at 488 nm and emission at 525 nm by EnSpire® Multimode Plate Reader (Perkin Elmer, Boston, MA).

#### **3.9.2 Hoechst 33342 staining**

A375 cells ( $1 \times 10^5$ ) were seeded on glass bottom dishes, cultured and treated with **1a** as described above. The cells were stained with Hoechst 33342 (Sigma, USA) for 20 mins at 37 °C in the dark condition after rinsed with PBS for twice. The images were exposed by the fluorescence microscope (Nikon, Japan).

#### **3.9.3 Western blot analysis**

After subjected to the indicated treatment, cells were harvested and lysed with cell lysis solution. Total proteins were quantified using the BCA protein assay kit. Equal amount of protein was run on 10% sodium dodecylsulfate (SDS) polyacrylamide gels and then transferred to PVDF membranes. The membranes were blocked in TBS-Tween 20 solution with non-fat dry milk prior to incubated overnight with primary antibodies PARP (SAB, USA), cleaved-PARP (SAB, USA), Caspase 3 (GenTex, USA) and cleaved-Caspase 3 antibodies (GenTex, USA) (1 mg/mL for each antibody). Following three washes with TBS-T, membranes were incubated with HRP conjugated secondary antibody for 2 h at room temperature. Then membranes were washed by TBS-T three times again,



developed in ECL and visualized with X-ray film.  $\beta$ -actin (GenTex, USA) was used as an internal control.

### 3.9.4 Immunohistochemistry

The expression of Caspase 3 in tumor tissues of nude mice model was assessed by immunohistochemistry assay. The samples were embedded in paraffin and stained by Caspase 3 antibodies (Bioworld, China).<sup>S5</sup> Images were then taken with a fluorescence microscope (Nikon, Japan).

### 3.9.5 TUNEL assay

Tumor apoptosis was performed following the manufacturer's instructions of terminal deoxynucleotidyl transferase DUTP nick end labeling (TUNEL) assay (Roche Applied Science, Germany). The slides were photographed with a fluorescence microscope (Nikon, Japan).

### 3.10 Statistical analysis

All results shown in the study were obtained in at least three independent experiments and were expressed as mean  $\pm$  standard deviation (SD). Statistical analysis of data was performed using Excel (Microsoft) and GraphPad Prism 5.0 software (GraphPad Software Inc, CA, USA). Significant differences are considered as  $*p < 0.05$ ;  $**p < 0.01$ ;  $***p < 0.001$ .

## 4. Data

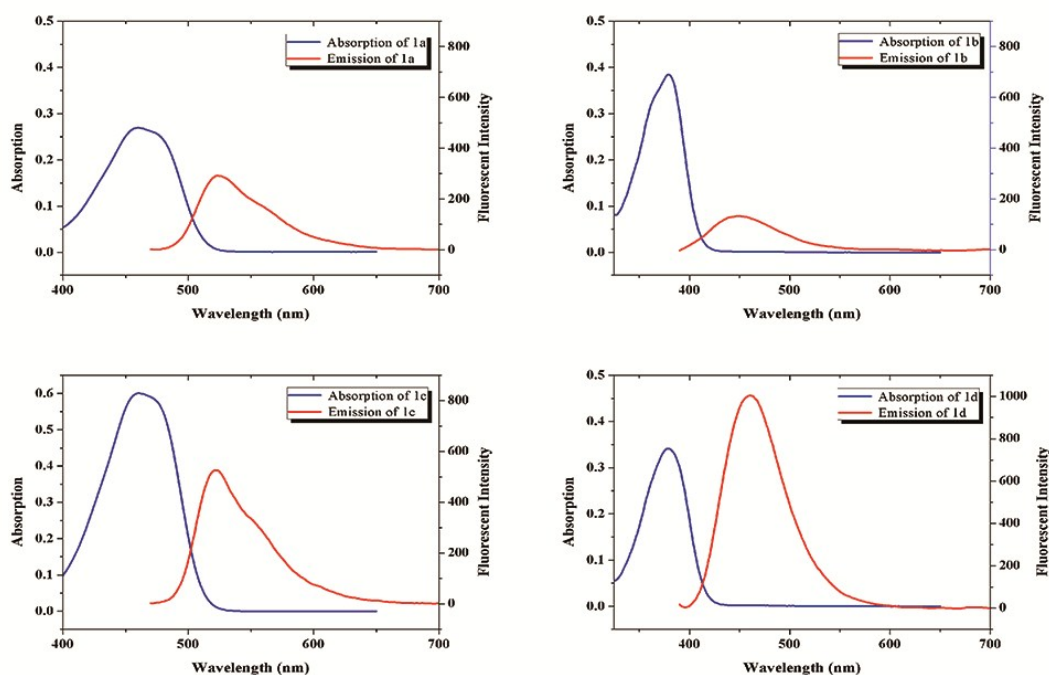

**Fig. S1** The UV absorption spectra (blue line) and fluorescent emission spectra (red line) of **1a** (25

$\mu\text{M}$ , slit: 2.5, 2.5), **1b** (25  $\mu\text{M}$ , slit: 5, 5), **1c** (25  $\mu\text{M}$ , slit: 2.5, 2.5) and **1d** (25  $\mu\text{M}$ , slit: 5, 5) in EtOH.

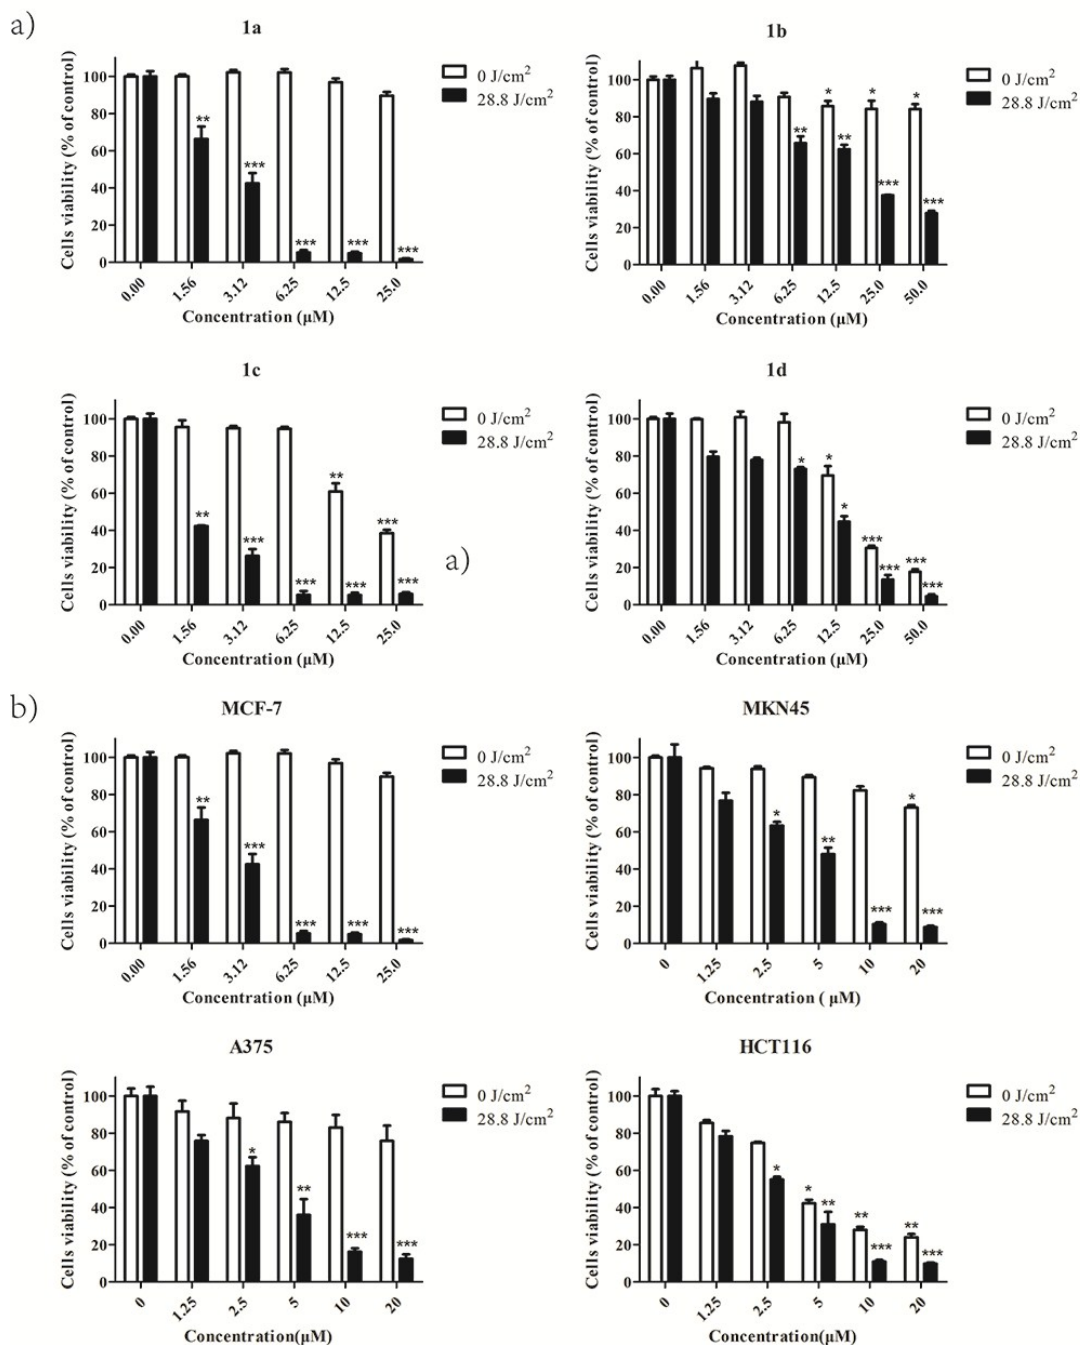

**Fig. S2** a) MTT assays of **1a-1d** exposed with laser irradiation of 0 and 28.8 J/cm<sup>2</sup> in MCF-7 cells; b) MTT assays of **1a** exposed with laser irradiation of 0 and 28.8 J/cm<sup>2</sup> light in A375, HCT116, MKN45 and MCF-7 cells.

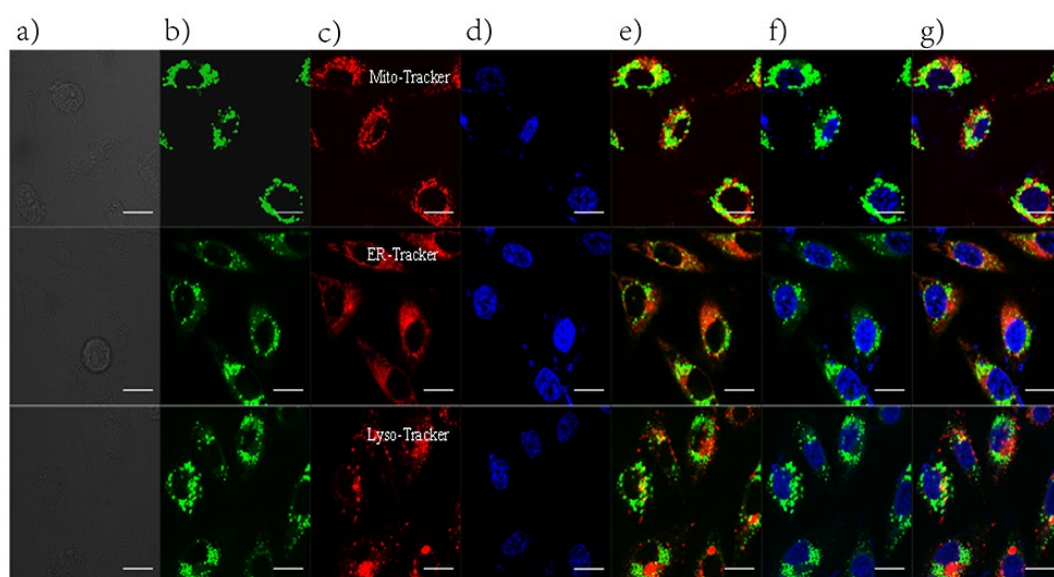

**Fig. S3** Fluorescence confocal microscopy imaging of **1a** in A375 cells. Co-localization with Mito-Tracker Red, ER-Tracker Red and Lysosome Tracker Red: a) white light; b) **1a**; c) organelles tracker probes; d) blue DAPI; e) the merge results of b and c; f) the merge results of b and d; g) the merge results of b, c and d. Bars: 10  $\mu$ m

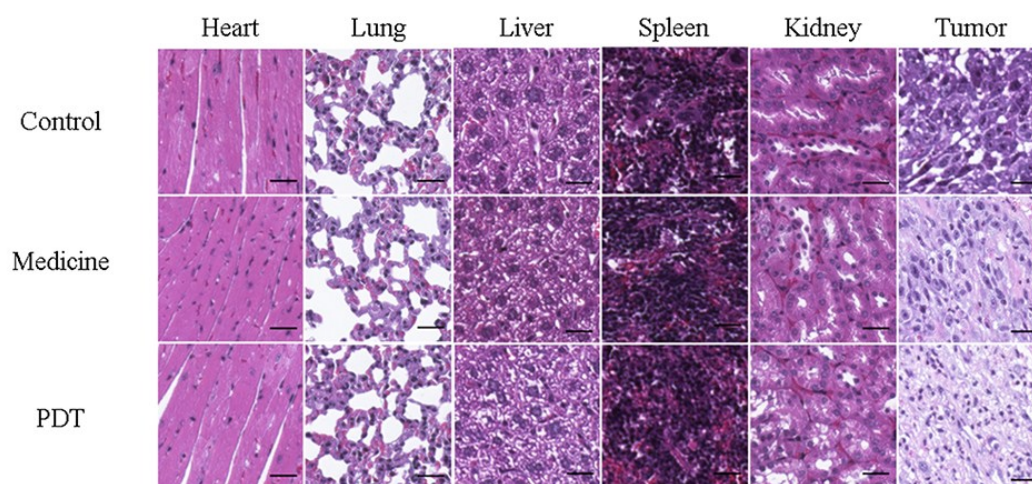

**Fig. S4** Pathological changes of major organs (including kidney, liver, spleen, heart and lung) and tumor tissues by H&E stained images. Bars: 50  $\mu$ m.

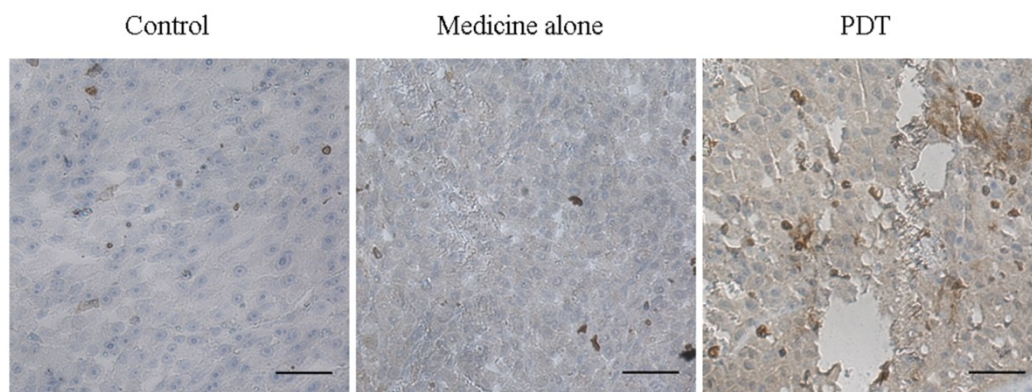

**Fig. S5** Immunohistochemical assessment of cleaved-Caspase 3 expression of tumor cells after **1a**-induced PDT treatment. Scale bars: 50 μm;

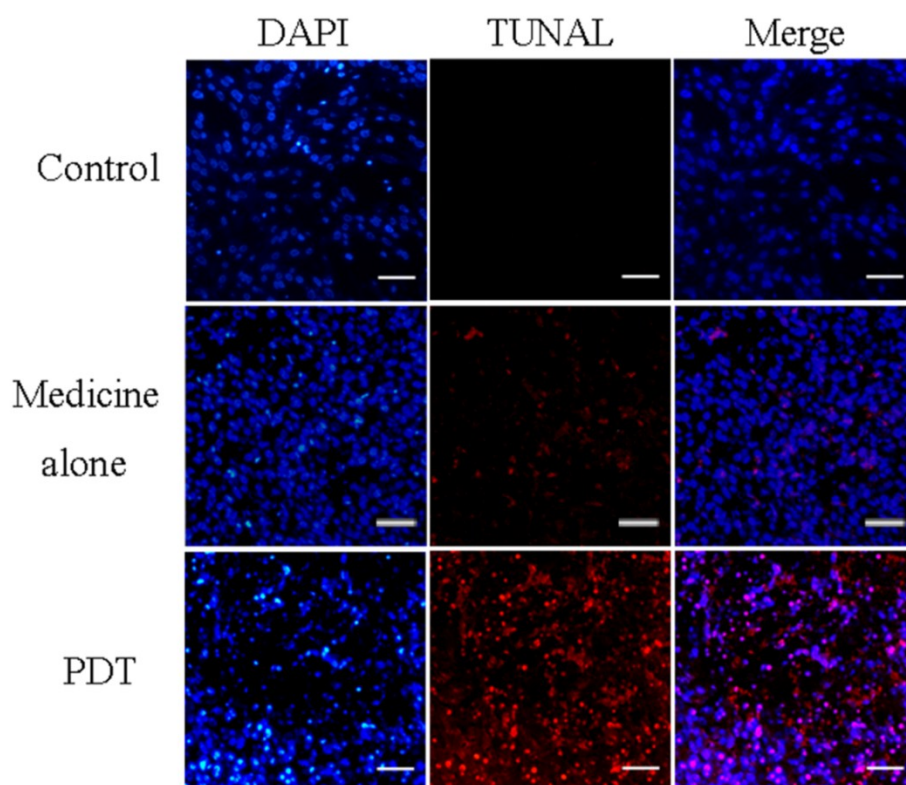

**Fig. S6** TUNEL assays of apoptotic cells in the tumor tissues. The nuclei stained with DAPI (bright blue) and apoptotic cells (bright red) were observed using fluorescent microscopy. Bars: 50 μm

## 5. NMR spectra



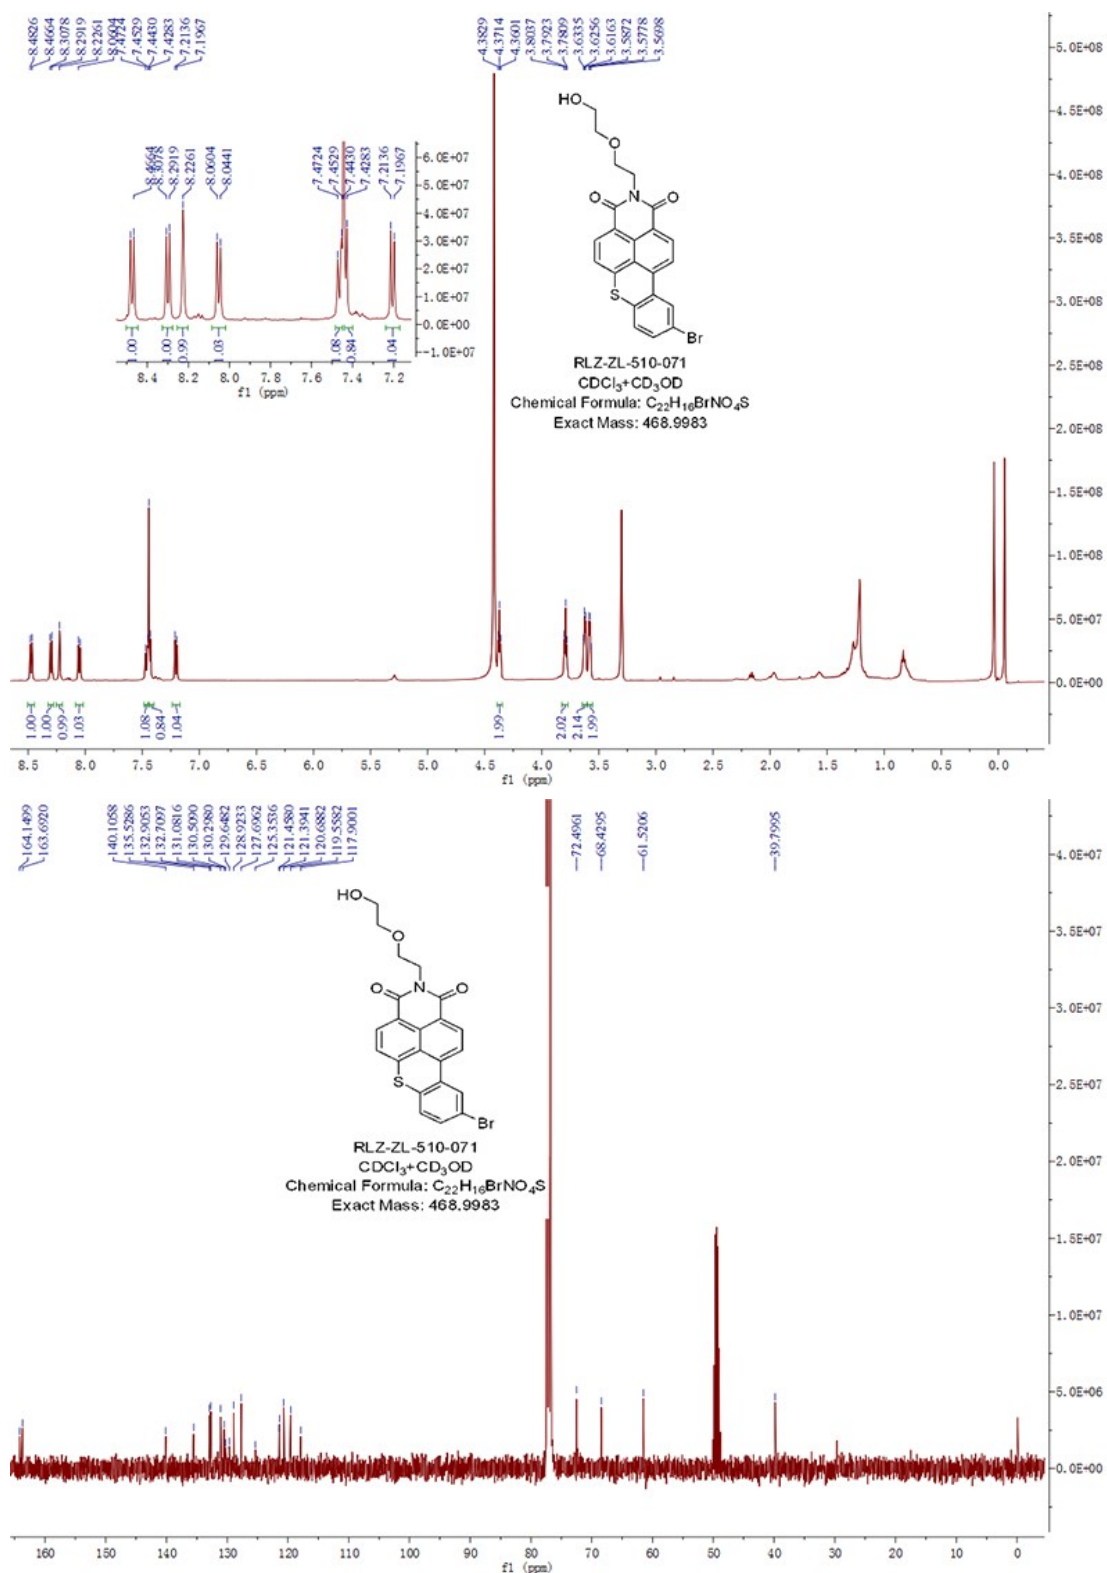

Fig. S7The <sup>1</sup>H-NMR and <sup>13</sup>C-NMR spectrum of **1a**

## Page 1

Element prediction: Off

Elements Used:

Elements Used: C: 0-24 H: 0-18 N: 0-1 O: 0-5 S: 0-1 79Br: 0-1 81Br: 0-1

RLZ-ZL-510-071

20160095 448 (7.467) Gm (448-(70+659))

Waters GCT Premier

TOF MS EI+  
1.51e+004

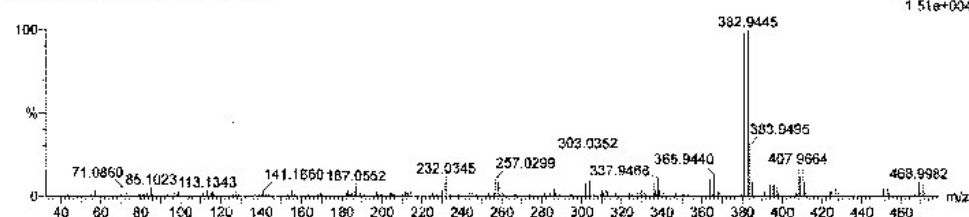

| Minimum: | 3.00   |            |      |       |      | -1.5      |                     |  |
|----------|--------|------------|------|-------|------|-----------|---------------------|--|
| Maximum: | 102.00 |            | 5.0  | 10.0  |      | 50.0      |                     |  |
| Mass     | RA     | Calc. Mass | MCa  | PEM   | DEE  | I-FIT     | Formula             |  |
| 57.0709  | 3.52   | 57.0764    | 0.4  | 7.0   | 0.5  | 2773012.9 | C4 H9               |  |
| 71.0860  | 4.58   | 71.0861    | -0.1 | -1.4  | 0.5  | 654.3     | C5 H11              |  |
| 85.1023  | 5.05   | 85.1077    | 0.6  | 7.1   | 0.5  | 213.5     | C6 H13              |  |
| 99.1175  | 3.26   | 99.1174    | 0.1  | 1.0   | 0.5  | 2773016.3 | C7 H15              |  |
| 113.1343 | 3.35   | 113.1330   | 1.3  | 11.5  | 0.5  | 57.3      | C8 H17              |  |
| 127.1493 | 4.09   | ---        |      |       |      |           |                     |  |
| 141.1660 | 3.24   | ---        |      |       |      |           |                     |  |
| 155.1798 | 3.00   |            |      |       |      |           |                     |  |
| 182.9687 | 3.1E   | 182.9684   | 0.3  | 1.6   | 5.0  | 156.5     | C7 H6 N 79Br        |  |
|          |        | 182.9666   | 2.1  | 11.5  | 0.5  | 213.8     | C5 H10 S 81Br       |  |
|          |        | 182.9657   | 3.0  | 16.4  | 0.5  | 172.7     | C4 H8 C3 79Br       |  |
|          |        | 182.9717   | -3.0 | -16.4 | 0.0  | 159.3     | C4 H10 N S 79Br     |  |
|          |        | 182.9718   | -3.1 | -16.9 | 1.0  | 202.0     | C4 H9 N O2 81Br     |  |
| 187.0552 | 7.21   | 187.0549   | 0.4  | 2.1   | 12.5 | 149.4     | C15 H7              |  |
|          |        | 187.0581   | -2.9 | -15.3 | 7.5  | 130.6     | C12 H11 S           |  |
|          |        | 187.0514   | 3.2  | 20.3  | -1.6 | 205.6     | C4 H13 N O5 S       |  |
| 214.0659 | 3.37   | 214.0657   | 0.2  | 5.9   | 13.5 | 2773034.5 | C15 H8 N            |  |
|          |        | 214.0664   | -0.5 | -2.3  | 4.0  | 2773176.8 | C10 H14 O3 S        |  |
|          |        | 214.0630   | 2.9  | 13.5  | 9.0  | 2773036.0 | C13 H10 O3          |  |
|          |        | 214.0690   | -3.1 | -14.3 | 3.5  | 2773169.3 | C73 H12 N S         |  |
| 230.0181 | 3.53   | 230.0181   | 0.0  | 0.0   | 3.5  | 950.7     | C9 H13 N O 79Br     |  |
|          |        | 230.0190   | -0.9 | -3.9  | 14.0 | 1335.2    | C16 H6 S            |  |
|          |        | 230.0163   | 1.8  | 7.8   | -1.0 | 1417.7    | C7 H17 O S 81Br     |  |
|          |        | 230.0157   | 2.4  | 10.4  | 19.0 | 1335.5    | C19 H2              |  |
|          |        | 230.0154   | 2.7  | 11.7  | -1.6 | 599.1     | C6 H15 O4 79Br      |  |
|          |        | 230.0214   | -3.3 | -14.3 | -1.5 | 841.2     | C6 H17 N O O S 79Br |  |
|          |        | 230.0215   | -3.4 | -14.9 | 10.0 | 1369.3    | C12 H6 O5           |  |
|          |        | 230.0215   | -3.4 | -14.8 | -0.5 | 1411.4    | C6 H15 N O3 81Br    |  |
| 231.0253 | 7.37   | 231.0259   | -0.6 | -2.6  | 3.0  | 939.2     | C9 H14 N O 79Br     |  |
|          |        | 231.0241   | 1.2  | 5.2   | -1.5 | 997.2     | C7 H18 O S 81Br     |  |
|          |        | 231.0268   | -1.5 | -6.5  | 13.5 | 861.7     | C16 H7 S            |  |
|          |        | 231.0235   | 1.9  | 7.9   | 18.5 | 882.1     | C19 H3              |  |
|          |        | 231.0232   | 2.1  | 9.1   | -1.5 | 969.9     | C6 H16 O4 79Br      |  |
|          |        | 231.0293   | -4.0 | -17.3 | -1.0 | 1049.8    | C6 H16 N O3 81Br    |  |
|          |        | 231.0293   | -4.0 | -17.3 | 9.5  | 965.3     | C12 H7 O5           |  |
|          |        | 231.0208   | 4.5  | 19.3  | 3.5  | 1017.0    | C10 H14 O 81Br      |  |
| 232.0345 | 11.86  | 232.0347   | -0.2 | -0.9  | 19.6 | 23.2      | C16 H8 S            |  |
|          |        | 232.0337   | 0.9  | 3.4   | 2.5  | 948.2     | C9 H15 N O 79Br     |  |
|          |        | 232.0371   | -2.6 | -11.2 | -1.5 | 176.3     | C6 H17 N O3 81Br    |  |
|          |        | 232.0372   | -2.7 | -11.6 | 5.0  | 90.8      | C12 H8 O5           |  |
|          |        | 232.0313   | 3.2  | 13.8  | 18.0 | 39.3      | C19 H4              |  |
| 233.0357 | 3.28   | 233.0358   | -0.1 | -0.4  | 4.0  | 2773199.3 | C8 H11 N O5 S       |  |

**Fig. S8** The HR-MS spectrum of **1a**

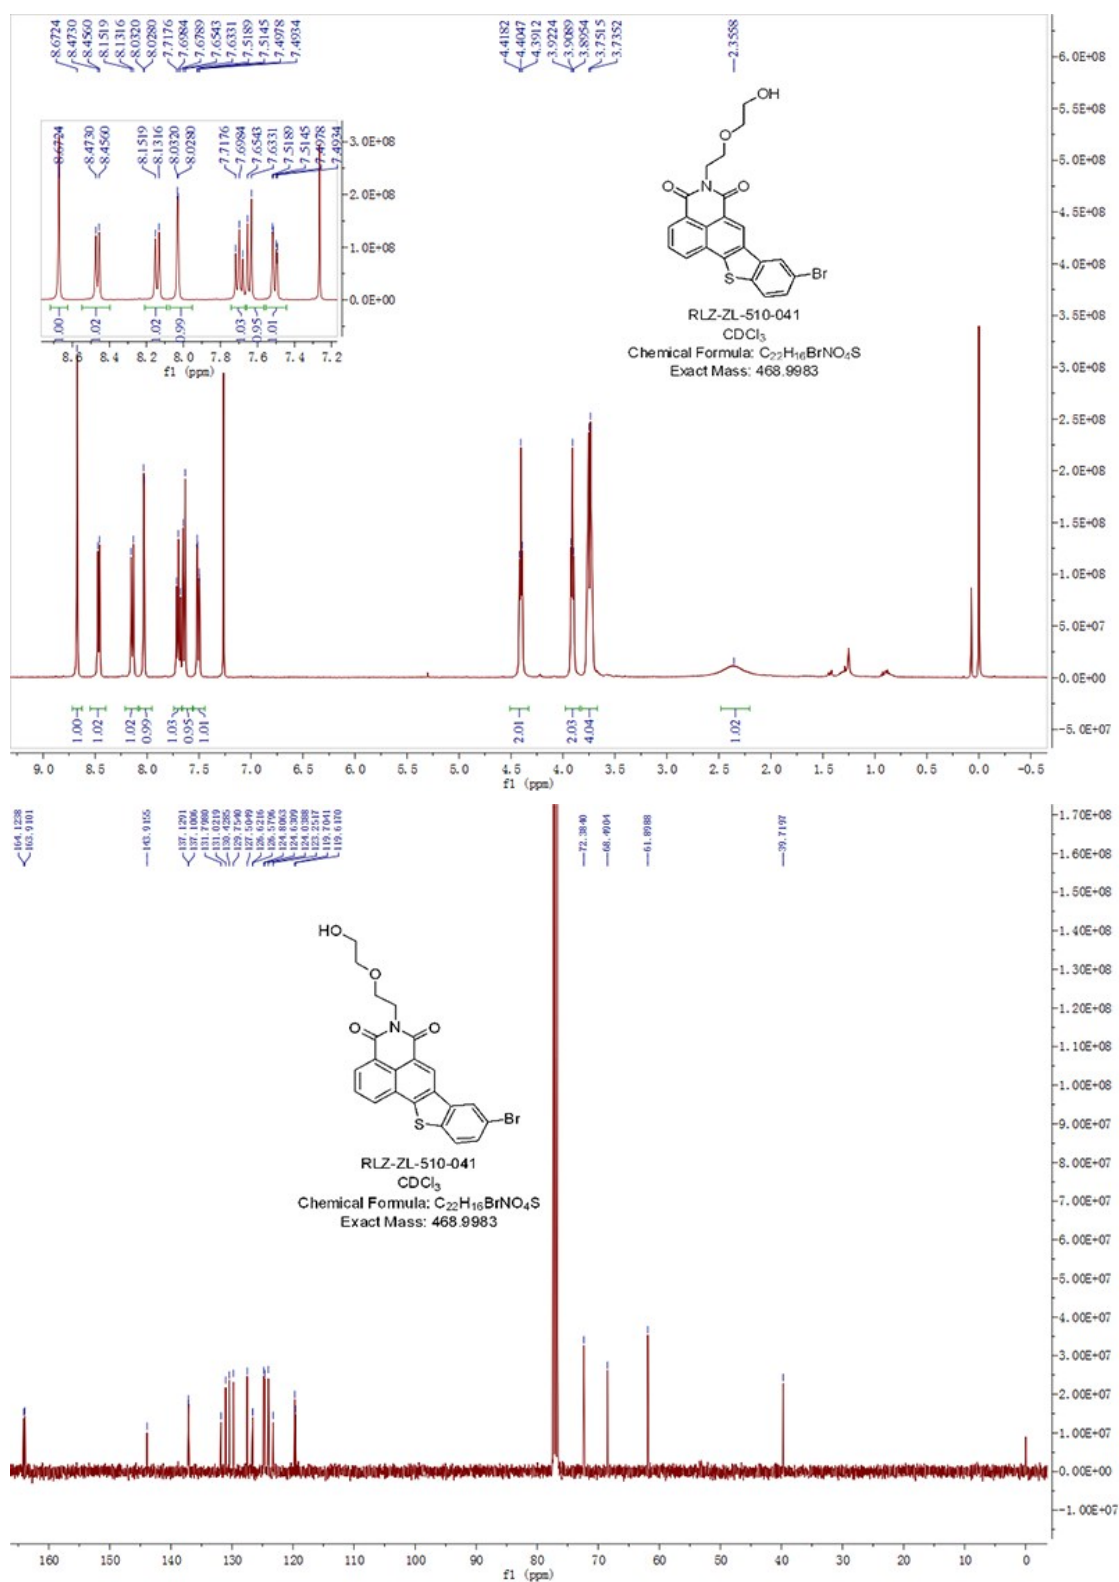

**Fig. S9** The <sup>1</sup>H-NMR and <sup>13</sup>C-NMR spectrum of **1b**

## Elemental Composition Report

Page 1

## Multiple Mass Analysis: 50 mass(es) processed

Tolerance = 5.0 mDa / DBE: min = -1.5, max = 50.0

Element prediction: Off

Monoisotopic Mass, Odd and Even Electron Ions

4707 formula(e) evaluated with 202 results within limits (all results (up to 1000) for each mass)

Elements Used:

C: 0-22 H: 0-16 N: 0-1 O: 0-4 S: 0-1 79Br: 0-1 81Br: 0-1

RLZ-ZL-510-041

Waters GCT Premier

20160115 427 (7.117) Cm (427-(87+93))

TOF MS EI+

1.74e+004

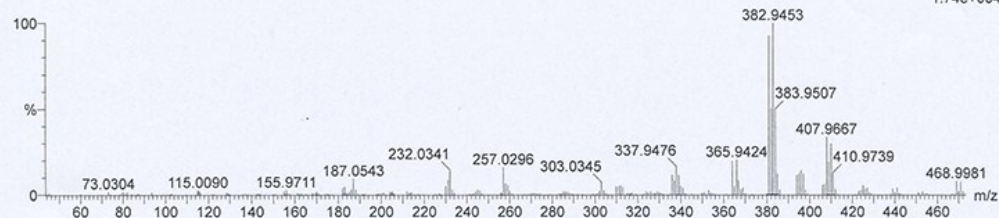

Minimum: 3.00  
Maximum: 100.00

| Mass     | RA    | Calc. Mass | mDa  | PPM   | DBE  | i-FIT     | Formula          |
|----------|-------|------------|------|-------|------|-----------|------------------|
| 181.9706 | 3.88  | 181.9701   | 0.5  | 2.7   | 11.5 | 346.1     | C10 N O S        |
|          |       | 181.9731   | -2.5 | -13.7 | 5.0  | 601.6     | C8 H7 79Br       |
|          |       | 181.9674   | 3.2  | 17.6  | 7.0  | 369.2     | C7 H2 O4 S       |
| 182.9697 | 4.70  | 182.9684   | 1.3  | 7.1   | 5.0  | 271.5     | C7 H6 N 79Br     |
|          |       | 182.9717   | -2.0 | -10.9 | 0.0  | 278.4     | C4 H10 N S 79Br  |
|          |       | 182.9718   | -2.1 | -11.5 | 1.0  | 249.6     | C4 H8 N O2 81Br  |
|          |       | 182.9666   | 3.1  | 16.9  | 0.5  | 255.2     | C5 H10 S 81Br    |
|          |       | 182.9657   | 4.0  | 21.9  | 0.5  | 293.4     | C4 H8 O3 79Br    |
| 187.0543 | 9.25  | 187.0548   | -0.5 | -2.7  | 12.5 | 72.1      | C15 H7           |
|          |       | 187.0581   | -3.8 | -20.3 | 7.5  | 75.9      | C12 H11 S        |
| 230.0202 | 4.93  | 230.0190   | 1.2  | 5.2   | 14.0 | 1788.5    | C16 H6 S         |
|          |       | 230.0215   | -1.3 | -5.7  | -0.5 | 1913.8    | C6 H15 N O3 81Br |
|          |       | 230.0181   | 2.1  | 9.1   | 3.5  | 1055.2    | C9 H13 N O 79Br  |
|          |       | 230.0242   | -4.0 | -17.4 | 14.5 | 1812.5    | C15 H4 N O2      |
|          |       | 230.0157   | 4.5  | 19.6  | 19.0 | 1793.0    | C19 H2           |
| 231.0257 | 8.47  | 230.0154   | 4.8  | 20.9  | -1.0 | 1113.0    | C6 H15 O4 79Br   |
|          |       | 231.0259   | -0.2 | -0.9  | 3.0  | 1365.0    | C9 H14 N O 79Br  |
|          |       | 231.0268   | -1.1 | -4.8  | 13.5 | 1144.6    | C16 H7 S         |
|          |       | 231.0235   | 2.2  | 9.5   | 18.5 | 1170.3    | C19 H3           |
|          |       | 231.0232   | 2.5  | 10.8  | -1.5 | 1401.8    | C6 H16 O4 79Br   |
|          |       | 231.0293   | -3.6 | -15.6 | -1.0 | 1393.7    | C6 H16 N O3 81Br |
|          |       | 231.0208   | 4.9  | 21.2  | 3.5  | 1349.9    | C10 H14 O 81Br   |
| 232.0341 | 14.27 | 232.0337   | 0.4  | 1.7   | 2.5  | 1253.4    | C9 H15 N O 79Br  |
|          |       | 232.0347   | -0.6 | -2.6  | 13.0 | 6.0       | C16 H8 S         |
|          |       | 232.0313   | 2.8  | 12.1  | 18.0 | 37.9      | C19 H4           |
| 233.0358 | 3.15  | 233.0364   | -0.6 | -2.6  | 2.5  | 2773048.3 | C10 H16 O 81Br   |
|          |       | 233.0391   | -3.3 | -14.2 | 17.5 | 2773071.3 | C19 H5           |
| 257.0296 | 15.96 | 257.0299   | -0.3 | -1.2  | 15.0 | 441.9     | C17 H7 N S       |
|          |       | 257.0272   | 2.4  | 9.3   | 10.5 | 502.6     | C14 H9 O3 S      |
|          |       | 257.0265   | 3.1  | 12.1  | 20.0 | 513.4     | C20 H3 N         |
|          |       | 257.0263   | 3.3  | 12.8  | 0.0  | 893.6     | C7 H16 N O4 79Br |
| 258.0358 | 6.52  | 258.0351   | 0.7  | 2.7   | 10.0 | 417.8     | C14 H10 O3 S     |
|          |       | 258.0344   | 1.4  | 5.4   | 19.5 | 403.2     | C20 H4 N         |
|          |       | 258.0377   | -1.9 | -7.4  | 14.5 | 381.5     | C17 H8 N S       |
|          |       | 258.0317   | 4.1  | 15.9  | 15.0 | 439.9     | C17 H6 O3        |
|          |       | 258.0317   | 4.1  | 15.9  | 4.5  | 520.8     | C11 H15 N O 81Br |
| 259.0420 | 5.52  | 259.0422   | -0.2 | -0.8  | 19.0 | 61.0      | C20 H5 N         |
|          |       | 259.0429   | -0.9 | -3.5  | 9.5  | 67.6      | C14 H11 O3 S     |
|          |       | 259.0395   | 2.5  | 9.7   | 14.5 | 77.2      | C17 H7 O3        |
|          |       | 259.0395   | 2.5  | 9.7   | 4.0  | 126.4     | C11 H16 N O 81Br |
|          |       | 259.0456   | -3.6 | -13.9 | 14.0 | 50.4      | C17 H9 N S       |
| 303.0345 | 7.09  | 303.0354   | -0.9 | -3.0  | 15.0 | 34.1      | C18 H9 N O2 S    |

本数据仅供科研教学参考使用  
不具有任何证明作用

Fig. S10The HR-MS spectrum of 1b



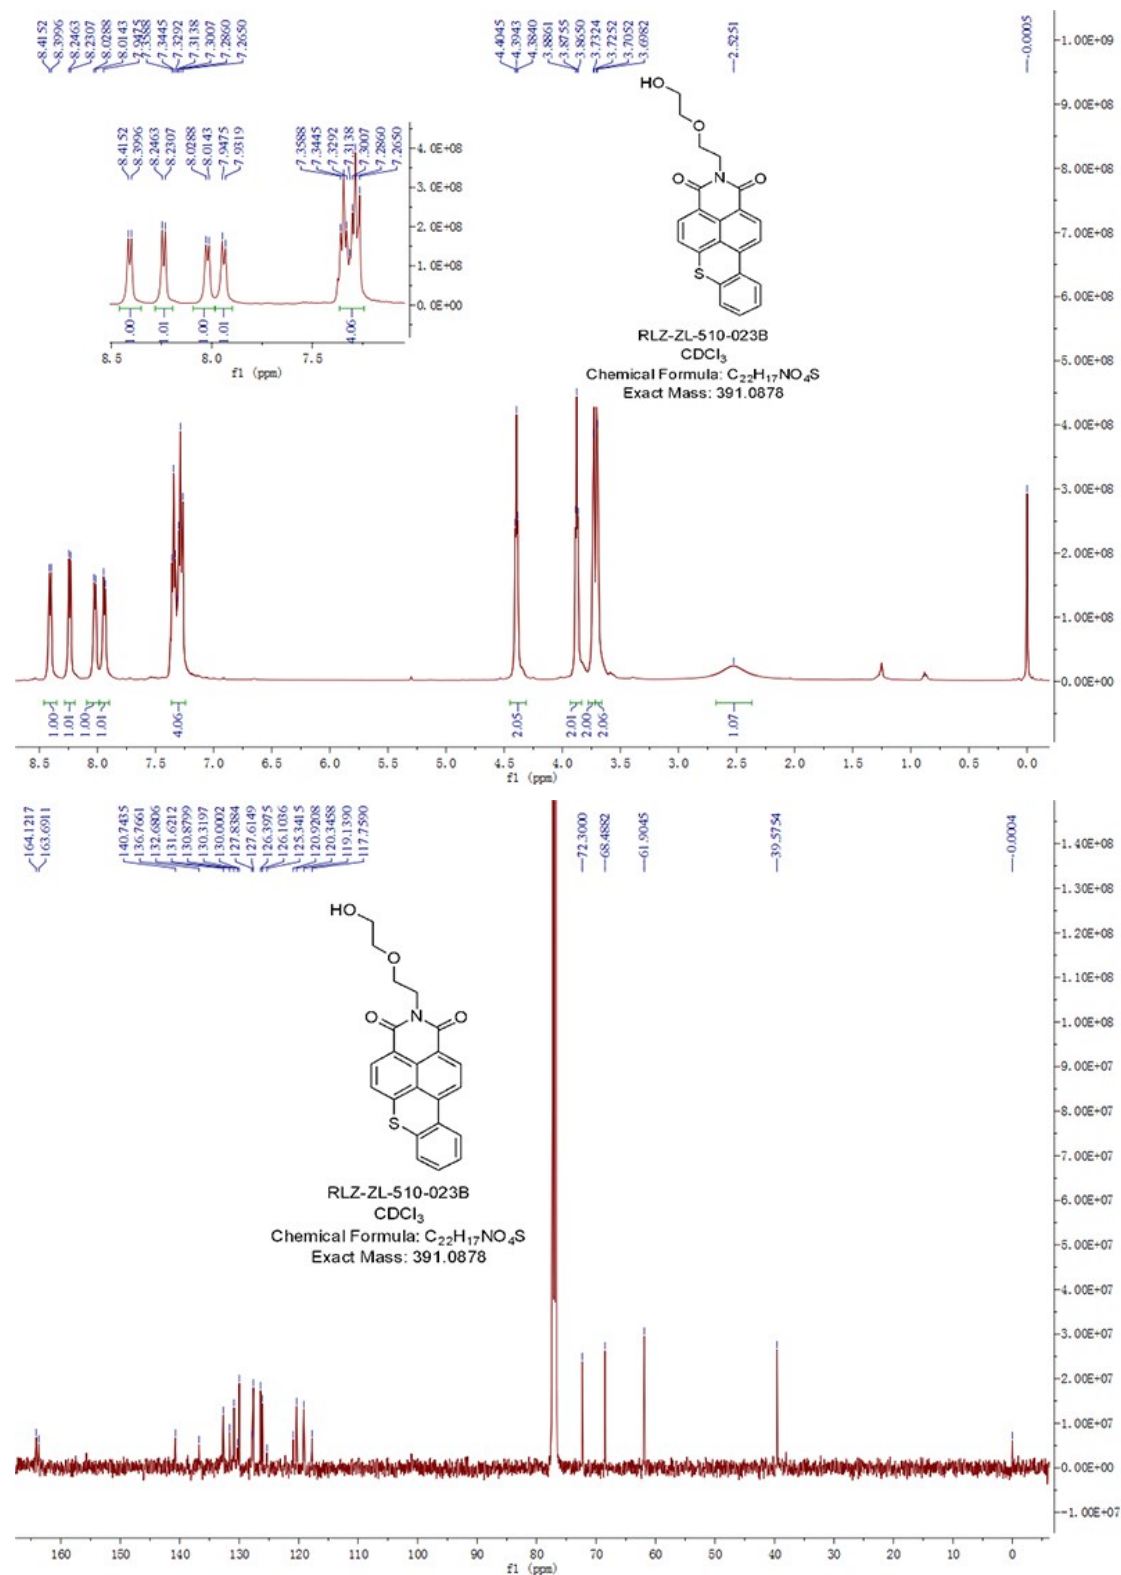

**Fig. S11** The <sup>1</sup>H-NMR and <sup>13</sup>C-NMR spectrum of **1c**

## Elemental Composition Report

Page 1

## Multiple Mass Analysis: 22 mass(es) processed

Tolerance = 5.0 mDa / DBE: min = -1.5, max = 50.0

Element prediction: Off

Monoisotopic Mass, Odd and Even Electron Ions

552 formula(e) evaluated with 43 results within limits (all results (up to 1000) for each mass)

Elements Used:

C: 0-22 H: 0-17 N: 0-4 O: 0-4 S: 0-1

RLZ-ZL-690-023b

GCT Premier

20141038 614 (f0.234) Cm (614-(5+826))

TOF MS EI+  
1.71e+004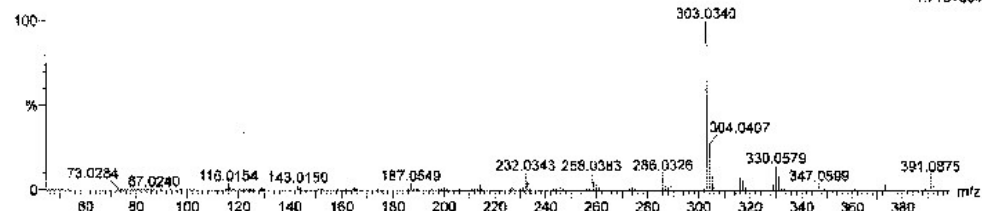

Minimum: 3.03  
Maximum: 100.00

| Mass     | RA     | Calc. Mass | mDa  | PPM   | DBE  | 1-FIT     | Formula        |
|----------|--------|------------|------|-------|------|-----------|----------------|
| 116.0154 | 3.46   | 116.0170   | -1.6 | -13.8 | 2.3  | 2772175.0 | C4 H6 N O S    |
|          |        | 116.0136   | 1.8  | 15.5  | 7.5  | 2773019.0 | C7 H2 N O      |
|          |        | 116.0110   | 4.4  | 37.9  | 3.0  | 2773023.8 | C4 H4 O4       |
| 187.0549 | 3.76   | 187.0548   | 0.1  | 0.5   | 12.5 | 314.4     | C15 H7         |
|          |        | 187.0581   | -3.2 | -17.1 | 7.5  | 303.7     | C12 H11 S      |
| 214.0656 | 3.12   | 214.0657   | -0.1 | -0.5  | 13.5 | 4.8       | C16 H8 N       |
|          |        | 214.0664   | -0.8 | -3.7  | 4.0  | 13.3      | C10 H14 O3 S   |
|          |        | 214.0630   | 2.6  | 12.1  | 9.0  | 9.1       | C13 H10 O3     |
|          |        | 214.0690   | -2.4 | -15.9 | 8.5  | 6.6       | C13 H12 N S    |
| 232.0343 | 9.87   | 232.0347   | -0.4 | -1.7  | 13.0 | 161.1     | C16 H8 S       |
|          |        | 232.0313   | 3.0  | 12.9  | 18.0 | 180.7     | C19 H4         |
| 233.0405 | 4.82   | 233.0391   | 1.4  | 6.0   | 17.5 | 1.5       | C19 H5         |
|          |        | 233.0425   | -2.0 | -8.6  | 12.5 | 15.8      | C16 H9 S       |
| 246.0383 | 3.16   | 246.0377   | 0.6  | 2.4   | 13.5 | 2773211.5 | C16 H8 N S     |
|          |        | 246.0351   | 3.2  | 13.0  | 9.0  | 2773217.5 | C13 H10 O3 S   |
|          |        | 246.0344   | 3.9  | 15.9  | 18.5 | 2773062.8 | C19 H4 N       |
| 258.0383 | 9.81   | 258.0377   | 0.6  | 2.3   | 14.5 | 428.6     | C17 H8 N S     |
|          |        | 258.0351   | 3.2  | 12.4  | 15.0 | 475.3     | C14 H10 O3 S   |
|          |        | 258.0344   | 3.9  | 15.1  | 19.5 | 472.3     | C20 H4 S       |
| 259.0448 | 5.52   | 259.0436   | -0.8 | -3.1  | 14.0 | 289.0     | C17 H9 N S     |
|          |        | 259.0429   | 1.5  | 7.3   | 9.5  | 315.8     | C14 H11 O3 S   |
|          |        | 259.0422   | 2.6  | 10.0  | 19.0 | 306.7     | C20 H5 N       |
| 260.0371 | 4.21   | 260.0391   | -1.0 | -3.8  | 9.5  | 67.0      | C13 H10 N O3 S |
|          |        | 260.0340   | 2.3  | 8.0   | 14.5 | 50.4      | C16 H6 N O3    |
| 286.0326 | 10.16  | 286.0327   | -0.1 | -0.3  | 15.5 | 73.3      | C18 H8 N O S   |
|          |        | 286.0300   | 2.6  | 9.1   | 11.0 | 84.0      | C15 H10 O4 S   |
|          |        | 286.0293   | 3.3  | 11.5  | 20.5 | 124.7     | C21 H4 N O     |
| 303.0340 | 100.00 | 303.0354   | -1.4 | -4.6  | 15.0 | 113.8     | C18 H9 N O2 S  |
|          |        | 303.0320   | 2.0  | 6.6   | 20.0 | 285.3     | C21 H5 N O2    |
| 304.0407 | 27.74  | 304.0399   | 0.8  | 2.6   | 13.5 | 43.8      | C21 H6 N O2    |
|          |        | 304.0132   | -2.5 | -8.2  | 14.5 | 50.2      | C18 H10 N O2 S |
| 305.0390 | 7.97   | 305.0425   | -3.5 | -11.5 | 16.5 | 85.9      | C22 H9 S       |
| 316.0435 | 7.31   | 316.0432   | 0.3  | 0.9   | 15.5 | 368.8     | C19 H10 N O2 S |
|          |        | 316.0399   | 3.6  | 11.4  | 20.5 | 326.6     | C22 H6 N O2    |
| 317.0514 | 6.02   | 317.0511   | 0.3  | 0.9   | 15.0 | 3.7       | C19 H11 N O2 S |
|          |        | 317.0477   | 3.7  | 11.7  | 20.0 | 8.1       | C22 H7 N O2    |
| 328.0451 | 3.22   | 328.0432   | 1.9  | 5.8   | 16.5 | 1336.2    | C20 H10 N O2 S |
| 329.0514 | 3.22   | 329.0511   | 0.3  | 0.9   | 16.0 | 1764.8    | C20 H11 N O2 S |
| 330.0579 | 14.27  | 330.0599   | -1.0 | -3.0  | 15.5 | 226.7     | C20 H12 N O2 S |
| 331.0650 | 7.83   | 331.0667   | -1.7 | -5.1  | 15.0 | 13.5      | C20 H13 N O2 S |
| 347.0599 | 3.87   | 347.0616   | -1.7 | -4.9  | 15.0 | 12.0      | C20 H13 N O3 S |
| 373.0806 | 3.47   | 373.0773   | 3.3  | 8.8   | 16.0 | 16.4      | C22 H15 N O3 S |
| 391.0875 | 9.78   | 391.0879   | -0.5 | -0.8  | 15.0 | 0.4       | C22 H17 N O4 S |

Fig. S12 The HR-MS spectrum of 1c

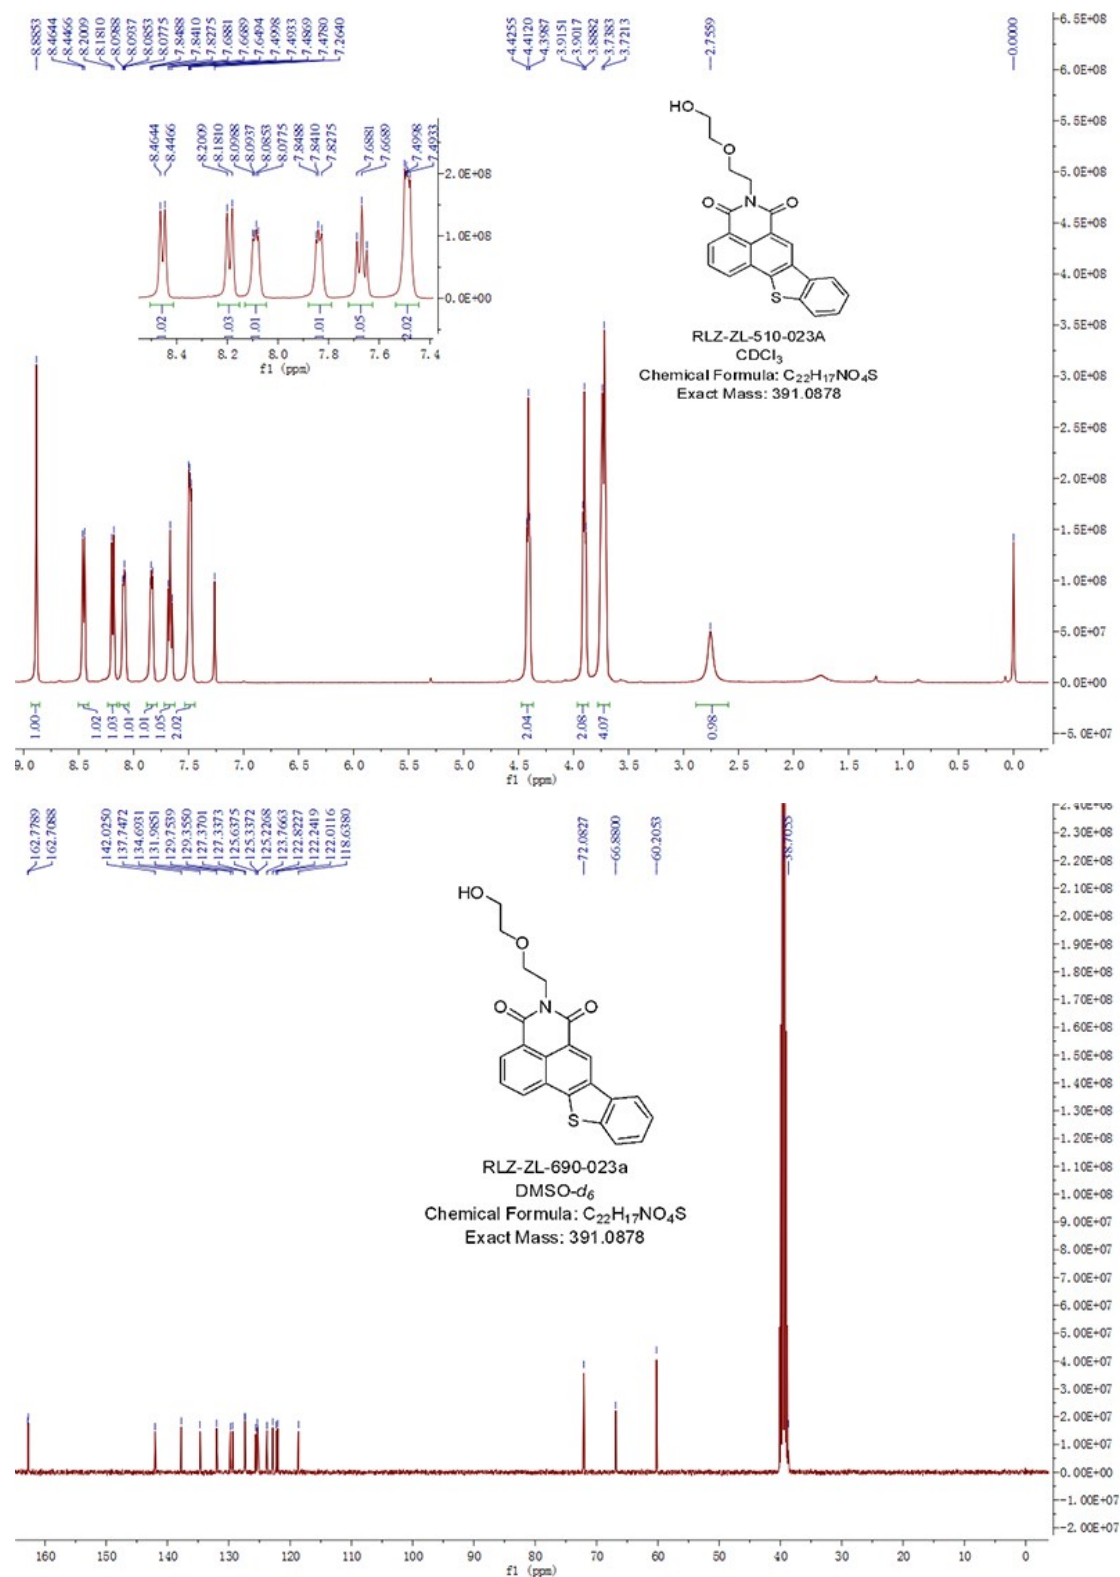

**Fig. S13** The  $^1\text{H}$ -NMR and  $^{13}\text{C}$ -NMR spectrum of **1d**

## Elemental Composition Report

Page 1

## Multiple Mass Analysis: 22 mass(es) processed

Tolerance = 5.0 mDa / DBE: min = -1.5, max = 50.0

Element prediction: Off

Monoisotopic Mass, Odd and Even Electron Ions

508 formula(e) evaluated with 39 results within limits (all results (up to 1000) for each mass)

Elements Used:

C: 0-22 H: 0-17 N: 0-1 O: 0-4 S: 0-1

RLZ-ZL-510-023A

20160116 622 (10.374) Cm (622-54.67)

Waters GCT Premier

TOF MS EI+  
9.18e+003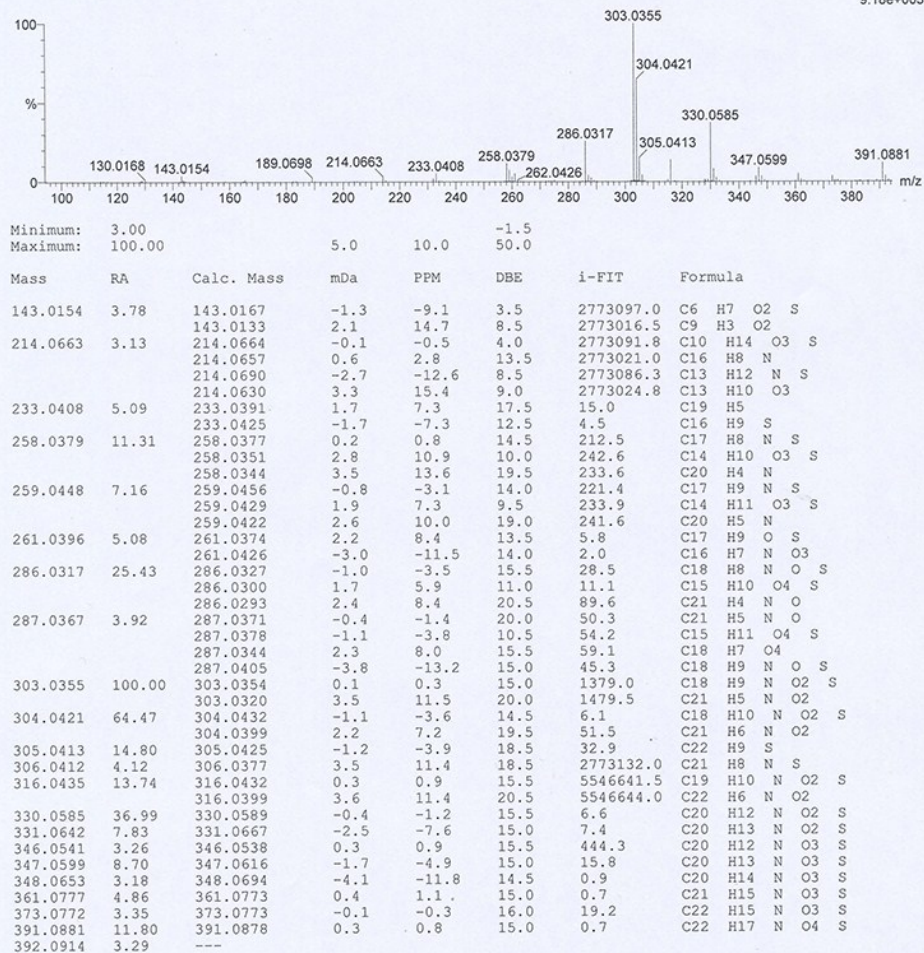本数据仅供科研教学参考使用，  
不具有任何证明作用。

Fig. S14 The HR-MS spectrum of 1d

RX C-18 4.6mm\*250 Flow=1ml/min 132bar buffer

```

=====
Injection Date   : 9/1/2015 3:56:38 PM
Sample Name     : ZL09-1-071           Vial : -
Acq. Operator   :
Method          : C:\HPCHEM\1\METHODS\ZL-1.M
Last changed    : 9/1/2015 2:23:57 PM
                  (modified after loading)
=====
DAD1 C, Sig=254.8 Ref=off (ZL\SEP00004.D)

```

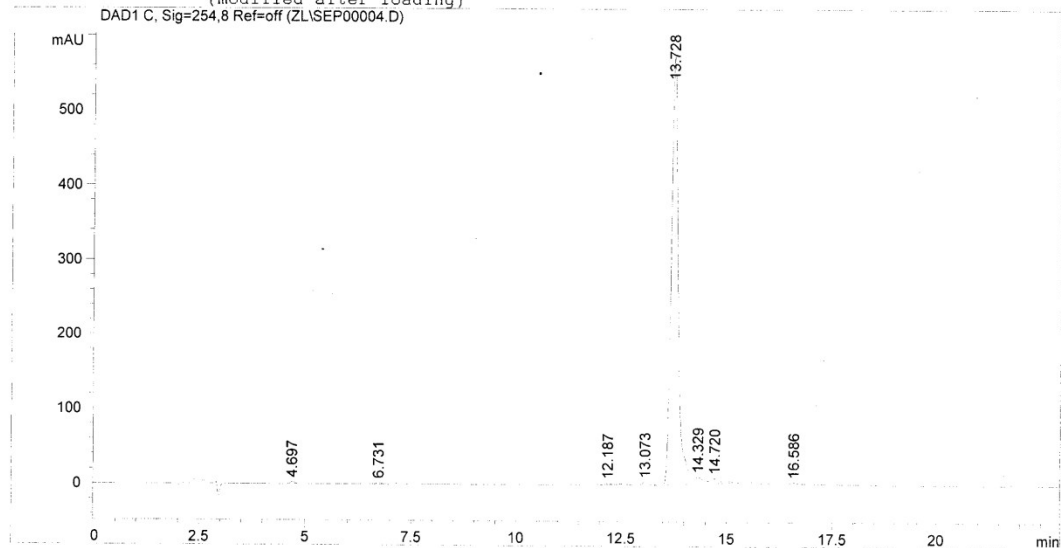

```

=====
Area Percent Report
=====

```

```

Sorted By      : Signal
Multiplier     : 1.0000
Dilution       : 1.0000

```

Signal 1: DAD1 C, Sig=254.8 Ref=off

| Peak # | RetTime [min] | Type | Width [min] | Area [mAU*s] | Height [mAU] | Area %  |
|--------|---------------|------|-------------|--------------|--------------|---------|
| 1      | 4.697         | BB   | 0.1126      | 19.95954     | 2.75191      | 0.2867  |
| 2      | 6.731         | BP   | 0.1602      | 24.49353     | 2.19506      | 0.3518  |
| 3      | 12.187        | BB   | 0.1350      | 16.66508     | 1.81653      | 0.2394  |
| 4      | 13.073        | BP   | 0.1430      | 31.62502     | 3.44885      | 0.4543  |
| 5      | 13.728        | BV   | 0.1752      | 6632.81689   | 572.54071    | 95.2725 |
| 6      | 14.329        | VV   | 0.1864      | 120.27122    | 8.96936      | 1.7276  |
| 7      | 14.720        | VB   | 0.2115      | 100.59117    | 6.39537      | 1.4449  |
| 8      | 16.586        | PB   | 0.1492      | 15.52197     | 1.62920      | 0.2230  |

```
Totals :                6961.94443  599.74699
```

Results obtained with enhanced integrator!

```

=====
*** End of Report ***
=====

```

Fig. S15 The HPLC report of 1a

RX C-18 4.6mm\*250 Flow=1ml/min 132bar buffer

=====

Injection Date : 9/1/2015 2:33:18 PM  
Sample Name : ZL09-1-041  
Acq. Operator :  
Method : C:\HPCHEM\1\METHODS\ZL-1.M  
Last changed : 9/1/2015 2:23:57 PM  
(modified after loading)

Vial : -

1b

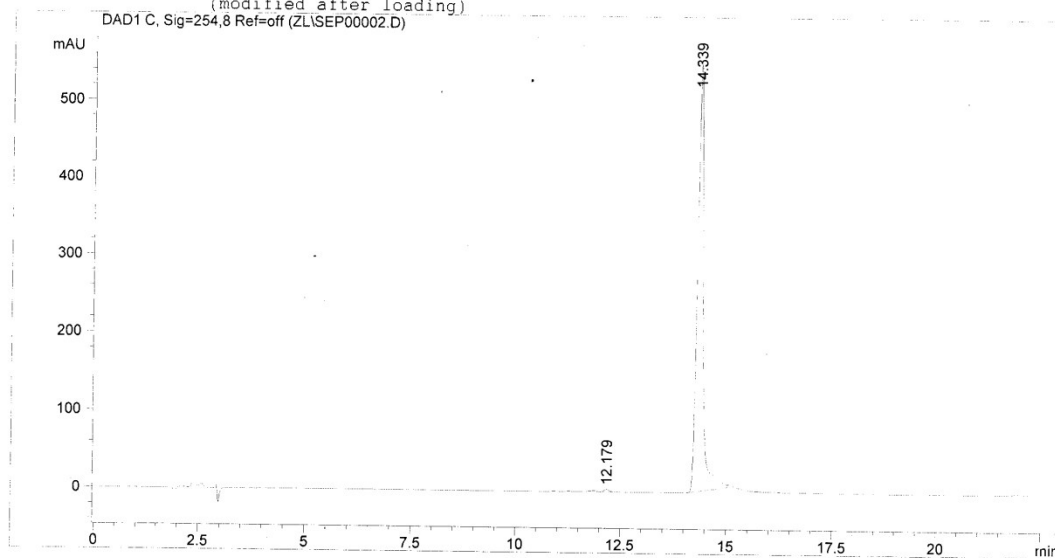

=====  
Area Percent Report  
=====

Sorted By : Signal  
Multiplier : 1.0000  
Dilution : 1.0000

Signal 1: DAD1 C, Sig=254.8 Ref=off

| Peak # | RetTime [min] | Type | Width [min] | Area [mAU*s] | Height [mAU] | Area %  |
|--------|---------------|------|-------------|--------------|--------------|---------|
| 1      | 12.179        | BP   | 0.1189      | 25.84955     | 3.39254      | 0.4675  |
| 2      | 14.339        | PB   | 0.1507      | 5503.07031   | 550.21826    | 99.5325 |

Totals : 5528.91986 553.61080

Results obtained with enhanced integrator!

=====  
\*\*\* End of Report \*\*\*

Fig. S16The HPLC report of 1b

XDB 4.6mm\*250 Flow=1.0ml/min 124bar (buffer)

```
=====
Injection Date : 3/17/2016 9:45:39 AM
Sample Name    : ZL03-17-023b          Vial : -
Acq. Operator  :
Method         : C:\HPCHEM\1\METHODS\ZL-1.M
Last changed   : 3/17/2016 8:29:00 AM
                (modified after loading)
=====
```

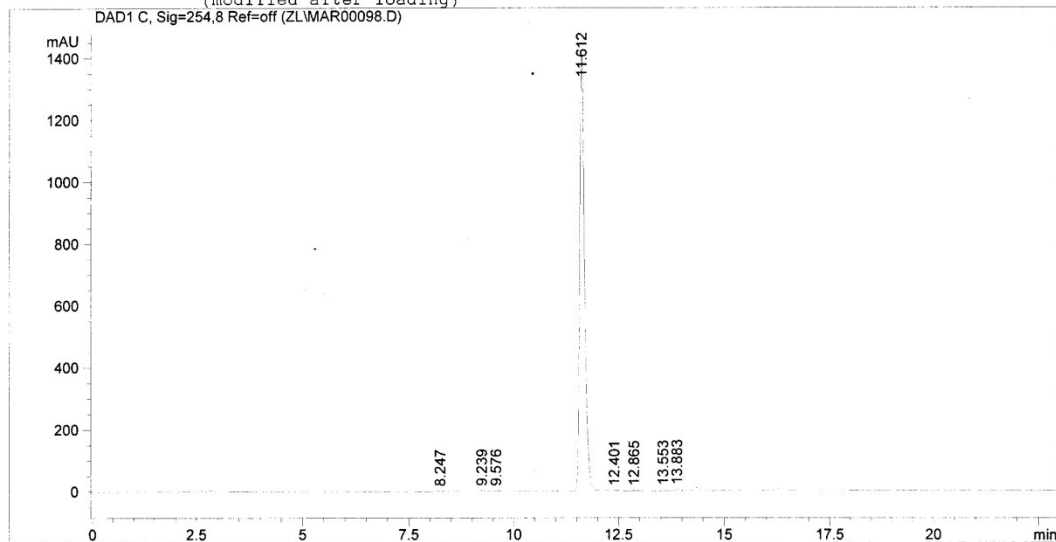

```
=====
Area Percent Report
=====
```

```
Sorted By      : Signal
Multiplier     : 1.0000
Dilution       : 1.0000
```

Signal 1: DAD1 C, Sig=254.8 Ref=off

| Peak # | RetTime [min] | Type | Width [min] | Area [mAU*s] | Height [mAU] | Area %  |
|--------|---------------|------|-------------|--------------|--------------|---------|
| 1      | 8.247         | BP   | 0.0965      | 19.55952     | 3.06262      | 0.1691  |
| 2      | 9.239         | BB   | 0.0937      | 24.38282     | 3.85981      | 0.2108  |
| 3      | 9.576         | BB   | 0.0956      | 26.75882     | 4.23897      | 0.2314  |
| 4      | 11.612        | BB   | 0.1220      | 1.13723e4    | 1411.86841   | 98.3392 |
| 5      | 12.401        | BB   | 0.1337      | 16.01753     | 1.64295      | 0.1385  |
| 6      | 12.865        | PP   | 0.1158      | 23.30769     | 3.02792      | 0.2015  |
| 7      | 13.553        | BB   | 0.1245      | 33.98743     | 3.86789      | 0.2939  |
| 8      | 13.883        | BP   | 0.1109      | 48.04242     | 6.60427      | 0.4154  |

Totals : 1.15643e4 1438.17283

Results obtained with enhanced integrator!

```
=====
*** End of Report ***
=====
```

Fig. S17The HPLC report of 1c

RX C-18 4.6mm\*250 Flow=1ml/min 132bar buffer

=====

Injection Date : 9/1/2015 2:03:58 PM  
Sample Name : ZL09-1-023a Vial : -  
Acq. Operator :  
Method : C:\HPCHEM\1\METHODS\ZL-1.M  
Last changed : 9/1/2015 2:23:57 PM  
(modified after loading)

DAD1 C, Sig=254.8 Ref=off (ZL\SEP00001.D)

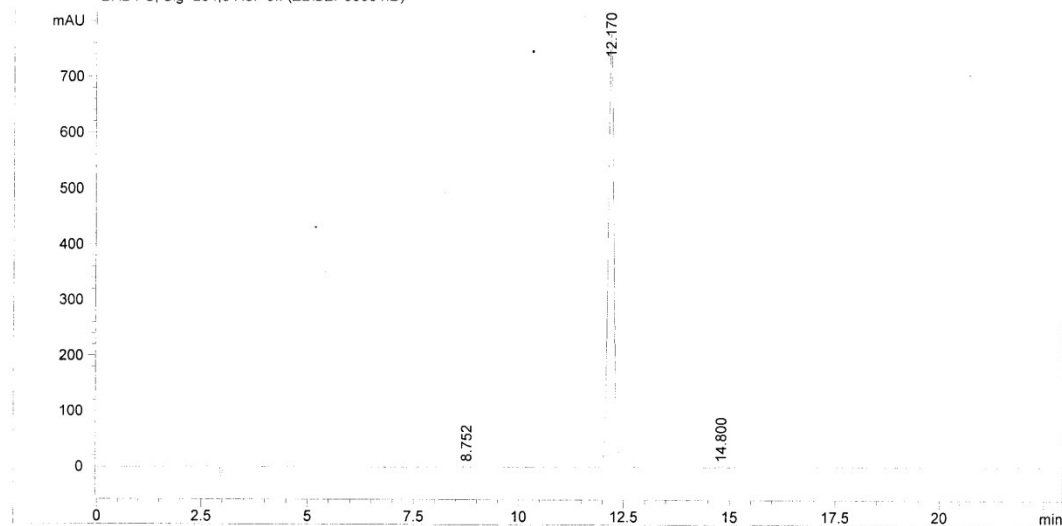

## Area Percent Report

Sorted By : Signal  
Multiplier : 1.0000  
Dilution : 1.0000

Signal 1: DAD1 C, Sig=254.8 Ref=off

| Peak # | RetTime [min] | Type | Width [min] | Area [mAU*s] | Height [mAU] | Area %  |
|--------|---------------|------|-------------|--------------|--------------|---------|
| 1      | 8.752         | BB   | 0.1288      | 20.05272     | 2.36865      | 0.2699  |
| 2      | 12.170        | BB   | 0.1452      | 7391.17627   | 775.62482    | 99.4861 |
| 3      | 14.800        | BB   | 0.1798      | 18.12612     | 1.60395      | 0.2440  |

Totals : 7429.35511 779.59742

Results obtained with enhanced integrator!

\*\*\* End of Report \*\*\*

Fig. S18 The HPLC report of 1d

## 6. References

- S1. Y. Xu, B. Qu, X. Qian and Y. Li, *Bioorg. Med. Chem. Lett*, 2005, **15**, 1139-1142.  
S2. N. Adarsh, R. R. Avirah and D. Ramaiah, *Org. Lett*, 2010, **12**, 5720-5723.



- S3. X. Liang, Y. Xu, K. Xu, J. Liu and X. Qian, *Mol.Cancer Res.*, 2010, **8**, 1619-1632.
- S4. Y. Xu, G. Xu, L. Liu, D. Xu and J. Liu, *J. Cell.Biochem*, 2010, **111**, 370-379.
- S5. H. Wang, L. Zhao, L. T. Zhu, Y. Wang, D. Pan, J. Yao, Q. D. You and Q. L. Guo, *Mol. Carcinogen.*, 2014, **53 Suppl 1**, E107-118.
